# Supplementary material
Source: Springer Nature journal article supplement (https://www.springermedizin.de/resource/supplementary/12906_2014_1904_MOESM5_ESM.pdf/9523144)
Supplement: MOESM5 [file 9523144]

IC50s and CC50s of fractions ( $\mu\text{g/ml}$ )

■ adult male worms ■ adult female worms ■ microfilariae ■ CC50

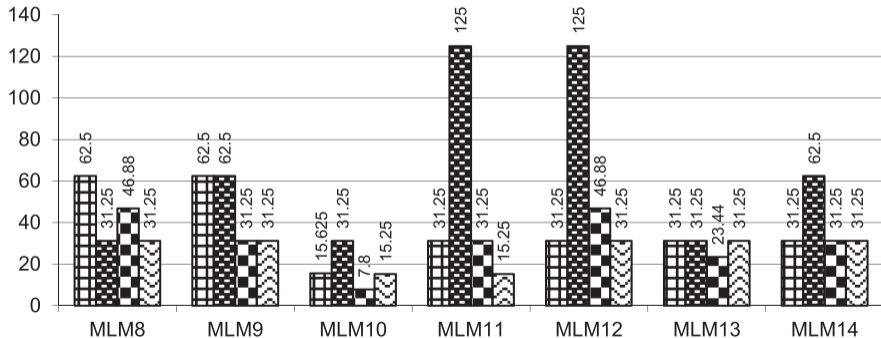

Most active fractions of ML leaves
